# Supplementary material for: Therapeutic effects of a walnut-derived peptide on NLRP3 inflammasome activation, synaptic plasticity, and cognitive dysfunction in T2DM mice
Source: Royal Society of Chemistry journal article supplement (doi:10.1039/d3fo05076a), 2024-01-01

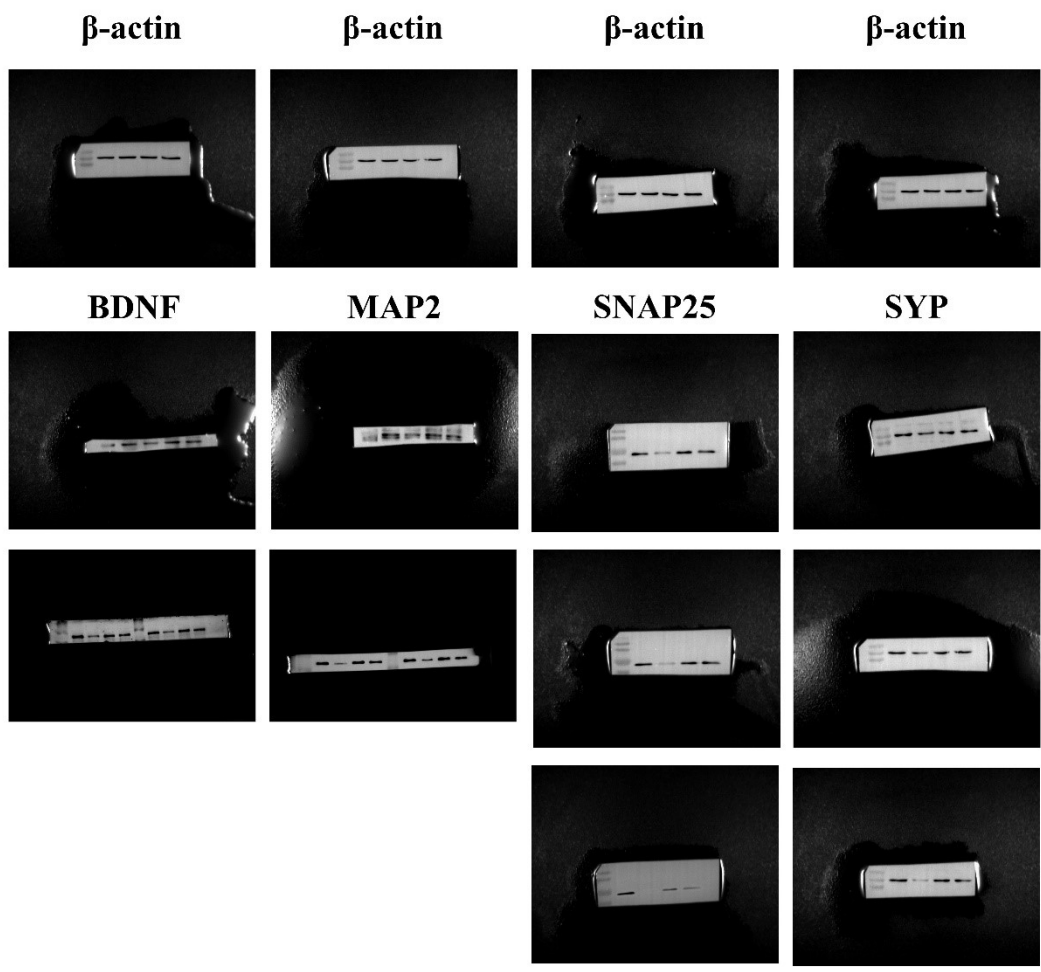

**GAPDH**

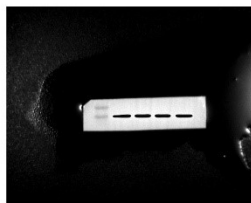

**GAPDH**

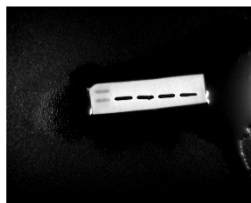

**GAPDH**

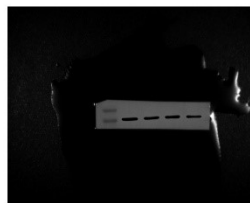

**GAPDH**

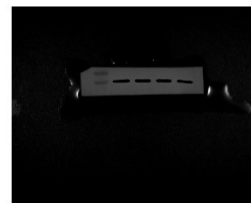

**NEK7**

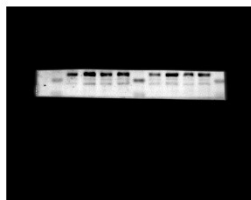

**NLRP3**

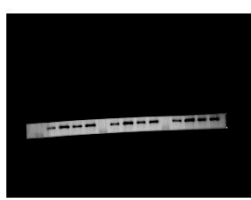

**ASC**

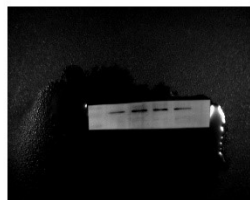

**Caspase-1**

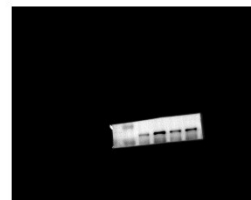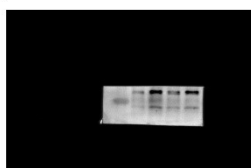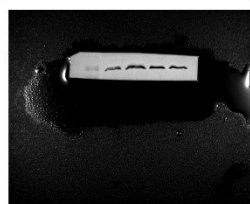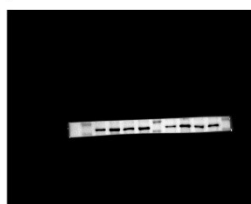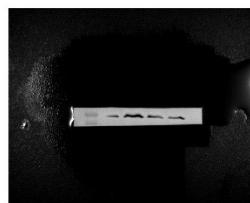

**β-actin**

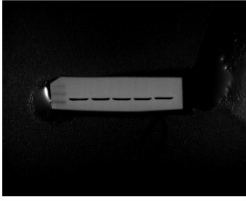

**β-actin**

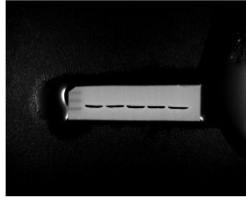

**β-actin**

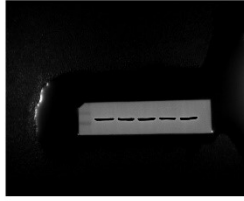

**SYP**

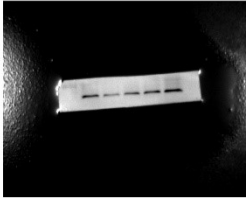

**SNAP25**

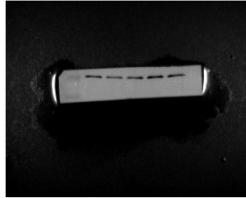

**BDNF**

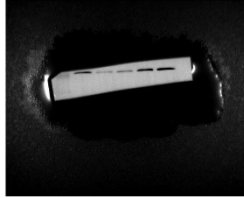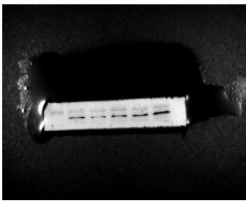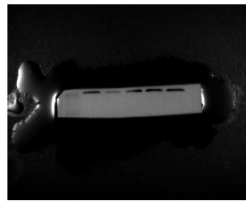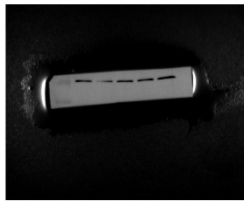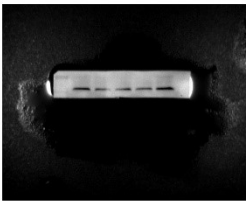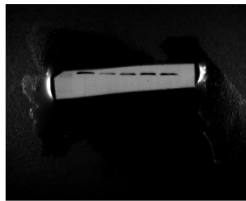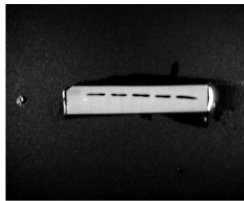

**GAPDH**

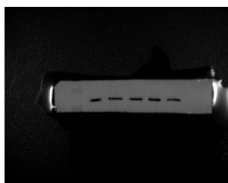

**GAPDH**

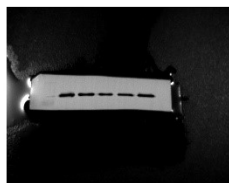

**GAPDH**

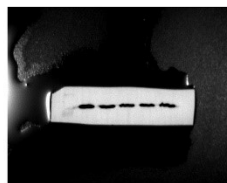

**NEK7**

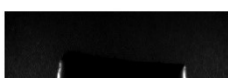

**NLRP3**

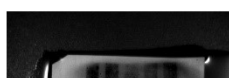

**ASC**

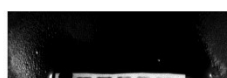

**Caspase-1**

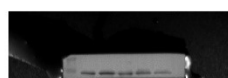

**GAPDH**

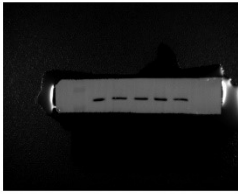

**GAPDH**

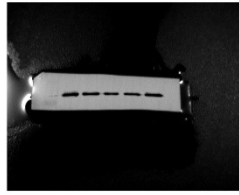

**GAPDH**

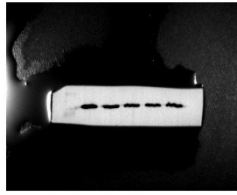

**NEK7**

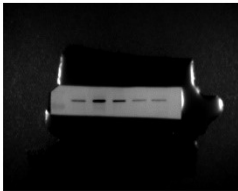

**NLRP3**

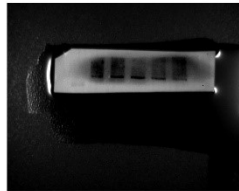

**ASC**

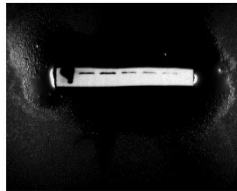

**Caspase-1**

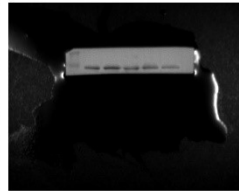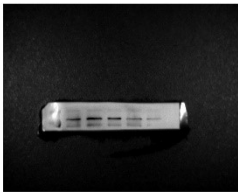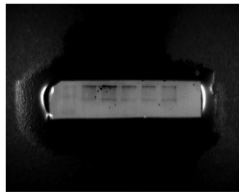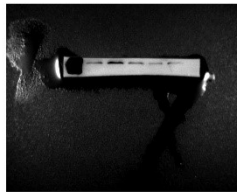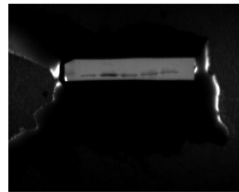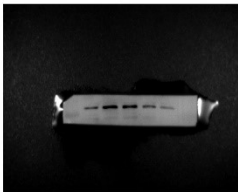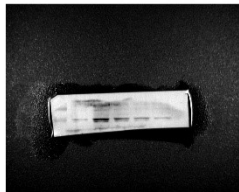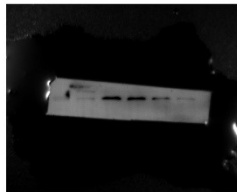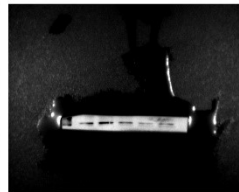

Supplement: d3fo05076a2.pdf [file d3fo05076a2.pdf]
